# Supplementary figures and images for: Plasma vitamin C concentrations and risk of incident respiratory diseases and mortality in the European Prospective Investigation into Cancer-Norfolk population-based cohort study
Source: Springer Nature journal article supplement (doi:10.1038/s41430-019-0393-1), 2019-01-31

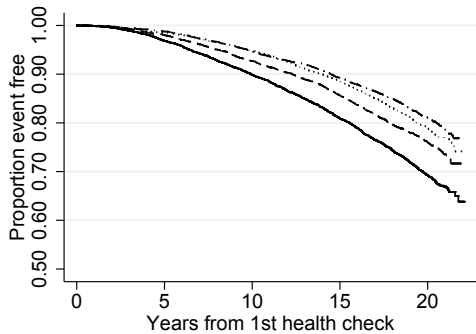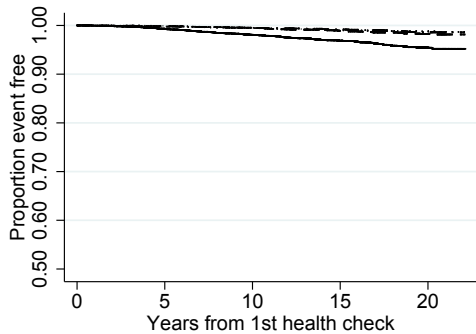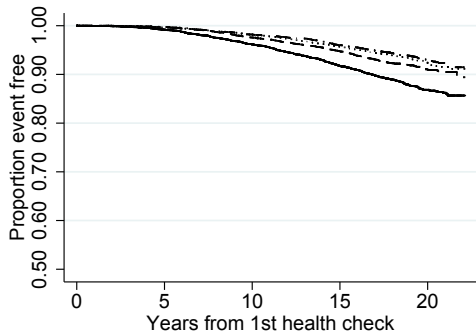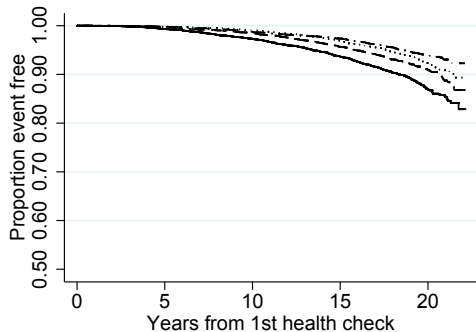

Supplement: 41430_2019_393_MOESM2_ESM.pdf [file 41430_2019_393_MOESM2_ESM.pdf]
